# Supplementary material
Source: publisher site journal article supplement (https://www.dovepress.com/article/475729)
Supplement: Supplementary file 1 [file get_supplementary_file.php]

***Supplementary Information***

**Supplement Table S1.** Univariate logistic regression analysis for the risk factors for disease exacerbation, hospitalization, and myasthenic crisis

| **Variables** | **Exacerbation** | | **Hospitalization** | | **MC** | |
| --- | --- | --- | --- | --- | --- | --- |
|  | **OR (95% CI)** | **p-value** | **OR (95% CI)** | **p-value** | **OR (95% CI)** | **p-value** |
| **Baseline data** | | | | | | |
| Sex (Male) | 0.980 (0.688, 1.395) | 0.909 | 0.851 (0.532, 1.361) | 0.501 | 1.309 (0.631, 2.713) | 0.469 |
| Age at onset, y | 1.024 (1.015, 1.033) | **< 0.001** | 1.036 (1.023, 1.049) | **< 0.001** | 1.037 (1.016, 1.058) | **0.001** |
| Age at onset, y  Juvenile MG  Early-onset MG  Late-onset MG | 1 [Reference]  2.214 (1.281, 3.826)  3.585 (2.089, 6.152) | **< 0.001**  **0.004**  **< 0.001** | 1 [Reference]  24.592 (3.343, 180.875)  38.770 (5.297, 283.789) | **< 0.001**  **0.002**  **< 0.001** | 1 [Reference]  6.495 (0.826, 51.105)  15.186 (2.017, 114.345) | **0.006**  **0.075**  **0.008** |
| Age at the diagnosis of COVID-19 | 1.028 (1.018, 1.039) | **< 0.001** | 1.042 (1.027, 1.057) | **< 0.001** | 1.047 (1.023, 1.073) | **< 0.001** |
| Duration before COVID-19, y | 0.989 (0.965, 1.013) | 0.374 | 0.980 (0.947, 1.015) | 0.259 | 1.001 (0.955, 1.049) | 0.968 |
| **Comorbidities** | | | | | | |
| Hypertension | 2.340 (1.514, 3.617) | **< 0.001** | 2.394 (1.394, 4.113) | **0.002** | 2.718 (1.214, 6.086) | **0.015** |
| Diabetes | 2.875 (1.714, 4.822) | **< 0.001** | 3.165 (1.717, 5.835) | **< 0.001** | 2.837 (1.120, 7.186) | **0.028** |
| Cardiovascular disease | 2.860 (1.367, 5.984) | **0.005** | 4.089 (1.823, 9.176) | **0.001** | 7.587 (2.858, 20.137) | **< 0.001** |
| Cerebrovascular disease | 3.763 (1.460, 9.688) | **0.006** | 5.088 (1.856, 13.950) | **0.002** | 3.567 (0.782, 16.268) | **0.010** |
| Chronic obstructive pulmonary disease | 2.527 (0.920, 6.942) | 0.072 | 3.045 (0.969, 9.569) | 0.057 | 3.810 (0.831, 17.466) | 0.085 |
| Chronic liver disease | 1.525 (0.546, 4.261) | 0.421 | 1.064 (0.242, 4.672) | 0.934 | 3.163 (0.700, 14.298) | 0.135 |
| Chronic kidney disease | 7.146 (2.504, 20.390) | **< 0.001** | 9.074 (3.199, 25.734) | **< 0.001** | 11.245 (3.356, 37.678) | **< 0.001** |
| Malignancy other than thymoma | 2.641 (1.144, 6.094) | **0.023** | 3.183 (1.233, 8.219) | **0.017** | 4.005 (1.129, 14.201) | **0.032** |
| Other AID | 0.852 (0.529, 1.373) | 0.511 | 1.199 (0.672, 2.139) | 0.539 | 0.717 (0.246, 2.086) | 0.541 |
| **Disease severity or status before COVID-19** | | | | | | |
| Generalized disease at onset | 1.906 (1.337, 2.719) | **< 0.001** | 2.473 (1.553, 3.940) | **< 0.001** | 2.882 (1.369, 6.068) | **0.005** |
| Maximum MGFA classification* | 1.300 (1.126, 1.501) | **< 0.001** | 1.399 (1.172, 1.669) | **< 0.001** | 1.377 (1.051, 1.804) | **0.020** |
| MMS or better status# | 0.151 (0.101, 0.226) | **< 0.001** | 0.145 (0.089, 0.236) | **< 0.001** | 0.176 (0.084, 0.369) | **< 0.001** |
| **Diagnostic findings** | | | | | | |
| Neostigmine test (+) | 0.852 (0.529, 1.373) | 0.622 | 1.416 (0.428, 4.685) | 0.569 | - | 0.998 |
| RNS abnormalities | 1.577 (0.924, 2.691) | 0.095 | 1.931 (0.896, 4.158) | 0.093 | 1.380 (0.431, 4.416) | 0.587 |
| Antibody status  Anti-AChR-ab (+)  Anti-MuSK-ab (+)  Anti-Titin-ab (+) | 1.844 (1.134, 2.999)  2.918 (1.111, 7.664)  1.385 (0.893, 2.149) | **0.014**  **0.030**  0.146 | 2.818 (1.331, 5.964)  2.625 (0.842, 8.183)  1.351 (0.771, 2.370) | **0.007**  0.096  0.293 | 2.682 (0.804, 8.944)  3.241 (0.711, 14.784)  1.075 (0.431, 2.679) | 0.108  0.129  0.877 |
| **Thymoma status** | | | | | | |
| Hyperplasia | 0.850 (0.446, 1.618) | 0.620 | 0.662 (0.259, 1.691) | 0.389 | 0.345 (0.046, 2.571) | 0.299 |
| Thymoma | 1.268 (0.845, 1.905) | 0.252 | 1.390 (0.826, 2.339) | 0.215 | 0.882 (0.355, 2.191) | 0.787 |
| Thymectomy | 1.122 (0.751, 1.674) | 0.574 | 1.038 (0.609, 1.767) | 0.892 | 0.467 (0.161, 1.354) | 0.161 |
| Time from onset to thymectomy, m | 0.998 (0.991, 1.006) | 0.672 | 0.996 (0.984, 1.008) | 0.522 | 0.997 (0.973, 1.022) | 0.819 |
| **COVID-19 related factors** | | | | | | |
| COVID-19 vaccination | 0.930 (0.605, 1.429) | 0.740 | 0.930 (0.532, 1.625) | 0.799 | 0.419 (0.191, 0.922) | **0.031** |
| COVID-19 symptoms  Fever  Cough  Vomiting or diarrhea  Myalgia | 1.621 (0.955, 2.752)  0.824 (0.581, 1.171)  1.282 (0.840, 1.957)  1.607 (1.059, 2.439) | 0.073  0.281  0.249  0.062 | 1.446 (0.726, 2.880)  0.950 (0.598, 1.507)  1.034 (0.581, 1.839)  1.570 (0.915, 2.692) | 0.294  0.826  0.911  0.101 | 1.313 (0.451, 3.824)  0.815 (0.393, 1.690)  1.031 (0.415, 2.566)  1.127 (0.453, 2.805) | 0.617  0.583  0.947  0.798 |

**Notes:** The likelihood ratio test was used for statistical analysis of possible risk factors in univariate logistic regression. Risk is presented as Odds ratio and 95% confidence interval. A p-value below 0.05 was considered statistically significant. Statistically significant results are bold.

*For regression analysis of MGFA classes II to IV, MGFA classes A and B were combined to allow for statistical analysis. Therefore, analysis is limited to MGFA classes without distinguishing the distribution of muscle weakness.

#For regression analysis of MGFA-PIS, “MMS or better” status includes complete stable remission, pharmacologic remission, and MMS.

**Abbreviations:** AID, autoimmune disease; anti-AChR-ab, anti-acetylcholine-receptor antibody; anti-MuSK-ab, anti-muscle-specific tyrosine kinase antibody; anti-LRP4-ab, anti-low-density lipoprotein receptor-related protein 4 antibody;  COVID-19, coronavirus disease 2019; IQR, interquartile range; MC, myasthenic crisis; MG, myasthenia gravis; MGFA, myasthenia gravis foundation of America classification; MMS, minimal manifestations status; RNS, repetitive nerve stimulation; PIS, postintervention status; Pre, prednisone.

**Supplement Table S2** Adjusted odds ratio and 95% confidence interval of therapeutic management of MG for poor outcomes following COVID-19 infection

| **Variables** | **N (%)** | **Exacerbation** | | **Hospitalization** | | **MC** | |
| --- | --- | --- | --- | --- | --- | --- | --- |
|  |  | **OR (95% CI)** | **p-value** | **OR (95% CI)** | **p-value** | **OR (95% CI)** | **p-value** |
| **Treatment modalities** | | | | | | | |
| None | 32 (3.8%) | 13.717 (4.824, 39.003) | **< 0.001** | 1.825 (0.540, 6.174) | 0.333 | 1.045 (0.209, 5.227) | 0.957 |
| Pyr alone | 132 (15.6%) | 2.144 (1.228, 3.743) | **0.007** | 2.525 (1.197, 5.325) | **0.015** | 2.964 (0.975, 9.009) | 0.055 |
| Pre and/or IS | 21 (2.5%) | 0.920 (0.206, 4.112) | 0.913 | 2.749 (0.582, 12.978) | 0.202 | - | 0.998 |
| Pyr+Low-dose Pre | 180 (21.3%) | 0.820 (0.475, 1.414) | 0.475 | 1.684 (0.833, 3.405) | 0.146 | 1.767 (0.607, 5.147) | 0.297 |
| Pyr+High-dose Pre | 57 (6.7%) | 1.060 (0.465, 2.416) | 0.890 | 0.625 (0.167, 2.333) | 0.484 | 0.695 (0.084, 5.754) | 0.736 |
| Pyr+IS | 121 (14.3%) | 0.410 (0.190, 0.885) | **0.023** | 0.245 (0.067, 0.888) | **0.032** | 0.264 (0.033, 2.119) | 0.210 |
| Pyr+low-dose Pre+IS | 215 (25.4%) | 0.744 (0.463, 1.198) | 0.224 | 0.704 (0.379, 1.308) | 0.266 | 0.571 (0.214, 1.519) | 0.261 |
| Pyr+high-dose Pre+IS | 87 (10.3%) | 0.744 (0.463, 1.198) | 0.450 | 0.682 (0.291, 1.600) | 0.380 | 1.166 (0.376, 3.621) | 0.790 |
| **Pre treatment** |  |  |  |  |  |  |  |
| The use of Pre | 549 (65.0％) | 0.635 (0.410, 0.982) | **0.041** | 0.851 (0.468, 1.546) | 0.596 | 0.840(0.335, 2.105) | 0.710 |
| Pre dosage, mg/day | NA | 0.988 (0.944, 1.033) | 0.581 | 0.993 (0.937, 1.051) | 0.801 | 1.044(0.959, 1.138) | 0.321 |
| High-dose Pre (≥ 0.25 mg/kg/d) | 146 (26.6％) | 0.986 (0.561, 1.731) | 0.960 | 0.640 (0.299, 1.373) | 0.252 | 1.027(0.329, 3.206) | 0.963 |
| Time from onset to Pre treatment, y | NA | 1.006 (0.962, 1.052) | 0.800 | 0.960 (0.893, 1.032) | 0.272 | 0.944(0.805, 1.107) | 0.476 |
| Early Pre (< 1 year) | 268 (48.8％) | 0.993 (0.584, 1.689) | 0.980 | 1.240 (0.628, 2.447) | 0.535 | 1.349(0.435, 4.179) | 0.604 |
| Duration of Pre usage, y | NA | 1.236 (1.102, 1.388) | **< 0.001** | 1.287 (1.123, 1.474) | **< 0.001** | 1.166(0.924, 1.472) | 0.196 |
| **IS treatment** |  |  |  |  |  |  |  |
| The use of IS | 443 (52.4％) | 0.443 (0.278, 0.705) | **0.001** | 0.387 (0.209, 0.715) | **0.002** | 0.379(0.149, 0.965) | **0.042** |
| Time from onset to IS treatment, y | NA | 1.031 (0.983, 1.081) | 0.208 | 1.040 (0.968, 1.116) | 0.283 | 0.886(0.726, 1.081) | 0.235 |
| Early IS (< 1 year) | 148 (33.4％) | 0.916 (0.496, 1.693) | 0.780 | 1.256 ( 0.554, 2.849) | 0.585 | 1.895(0.491, 7.317) | 0.354 |
| Duration of IS usage, y | NA | 1.391 (1.179, 1.643) | **< 0.001** | 1.498 ( 1.191, 1.883) | **0.001** | 1.433(1.021, 2.011) | **0.037** |

**Notes:** The likelihood ratio test was used for statistical analysis of possible risk factors in logistic regression. OR and 95% CI were adjusted for sex, age at onset, hypertension, diabetes, cardiovascular disease, cerebrovascular disease, chronic kidney disease, malignancy other than thymoma, symptoms at onset, MGFA classification, MGFA-PIS before COVID-19, anti-AChR and anti-MuSK-ab status. A p-value below 0.05 was considered statistically significant. Statistically significant results are bold.

-: Estimates are unreliable due to the small number of observations.

**Abbreviations:** anti-AChR-ab, anti-acetylcholine-receptor antibody; anti-MuSK-ab, anti-muscle-specific kinase antibody; CI, confidence interval; IS, immunosuppressant; MC, myasthenic crisis; MG, myasthenia gravis; MGFA, myasthenia gravis foundation of America classification; MM, minimal manifestations; NA, not available; OR, odds ratio; PIS, postintervention status; Pre, prednisone; Pyr, pyridostigmine.

**Supplement Table S3** Demographics and clinical features of MG patients with blood test results available

| Characteristics | Total  (n=376) | Uninfected group  (n=273) | Infected group  (n=103) | P value |
| --- | --- | --- | --- | --- |
| Sex  Male  Female | 211 (56.1%)  165 (43.9%) | 151 (55.3%)  122 (44.7%) | 60 (58.3%)  43 (41.7%) | 0.608 |
| Age at blood test, y | 54.8 (42.3, 65.0) | 54.2 (42.6, 62.4) | 59.0 (41.0, 69.0) | **0.047** |
| Duration before the blood test, y | 2.5 (1.4, 6.0) | 2.4 (1.5, 5.2) | 3.3 (1.2, 8.2) | 0.157 |
| Chronic disease history  Any  Hypertension  Diabetes  Cardiovascular disease  Cerebrovascular disease  Chronic obstructive pulmonary disease  Chronic liver disease  Chronic kidney disease  Malignancy other than thymoma  Other AIDd | 194 (51.6%)  80 (21.3%)  53 (14.1%)  29 (7.7%)  12 (3.2%)  12 (3.2%)  14 (3.7%)  14 (3.7%)  13 (3.5%)  76 (20.2%) | 131 (48.0%)  56 (20.5%)  32 (11.7%)  19 (7.0%)  6 (2.2%)  7 (2.6%)  8 (2.9%)  5 (1.8%)  6 (2.2%)  51 (18.7%) | 63 (61.2%)  24 (23.3%)  21 (20.4%)  10 (9.7%)  6 (5.8%)  5 (4.9%)  6 (5.8%)  9 (8.7%)  7 (6.8%)  25 (24.3%) | **0.023**  0.556  **0.031**  0.373  0.074  0.260  0.186  **0.002**  **0.030**  0.229 |
| MGFA classification at test*  I  II  III-V | 128 (34.0%)  129 (34.3%)  119 (31.6%) | 105 (38.5%)  109 (39.9%)  59 (21.6%) | 23 (22.3%)  20 (19.4%)  60 (58.3%) | **< 0.001** |
| Antibody status  Anti-AChR-ab (+)  Anti-MuSK-ab (+) | 304/368 (80.9%)  10/363 (2.7%) | 211/268 (78.7%)  7/266 (2.6%) | 93/100 (93.0%)  3/97 (3.1%) | **0.001**  0.812 |
| Thymoma# | 102 (27.1%) | 71 (26.0%) | 31 (30.1%) | 0.426 |
| Thymectomy | 100 (26.6%) | 72 (26.4%) | 28 (27.2%) | 0.874 |
| Time from onset to thymectomy, m | 4.0 (1.0, 11.8) | 4.0 (1.1, 10.0) | 3.0 (1.0, 21.8) | 0.994 |
| COVID-19 vaccination | 219/288 (76.0%) | 166/209 (79.4%) | 53/79 (67.1%) | 0.029 |
| Medications before COVID-19  None  Pyr  Pre  IS  AZA  MMF  MTX  TAC  RTX | 10 (2.7%)  283 (75.3%)  305 (81.1%)  208 (55.3%)  18 (8.7%)  34 (16.3%)  6 (2.9%)  144 (69.2%)  6 (2.9%) | 0 (0.0%)  271 (99.3%)  235 (86.1%)  159 (58.2%)  10 (6.3%)  28 (17.6%)  4 (2.5%)  113 (71.1%)  4 (2.5%) | 10 (9.7%)  12 (11.7%)  70 (68.0%)  49 (47.6%)  8 (16.3%)  6 (12.2%)  2 (4.1%)  31 (63.3%)  2 (4.1%) | **< 0.001**  **< 0.001**  **< 0.001**  0.063 |

**Notes:** Data are given as median (IQR), n (%), or n/N (%), where N is the total number of patients with available data.

The significance of the two groups was assessed by the Mann-Whitney *U* or χ2 test. A *p*-value below 0.05 was considered statistically significant and statistically significant results are bold.

*As there were a small number of patients in MGFA classes III, IV, and V, we combined these three classes into one group and referred to them as “moderate to severe disease”.

#Thymoma was evaluated by chest radiographic examination in 16 non-thymectomized patients and histologic examination in 86 thymectomized patients.

**Abbreviations:** AID, autoimmune disease; anti-AChR-ab, anti-acetylcholine-receptor antibody; anti-MuSK-ab, anti-muscle-specific kinase antibody; COVID-19, coronavirus disease 2019; IS, immunosuppressant; MG, myasthenia gravis; MGFA, myasthenia gravis foundation of America classification; RNS, repetitive nerve stimulation; PIS, postintervention status; Pre, prednisone; Pyr, pyridostigmine.

**Supplement Table S4** Comparison of laboratory factors between MG patients with and without COVID-19 infection in a smaller sample with blood test results available

| Variables | Comparison* | | |
| --- | --- | --- | --- |
| Uninfected group | Infected group | P value |
| **Blood routine (n)** | 273 | 103 |  |
| Leucocytes, ×109/L  Neutrophils,×109/L  Neutrophil percentage, %  Lymphocytes, ×109/L  Lymphocyte percentage, %  Neutrophil-to-lymphocyte ratio  Monocytes,×109/L  Monocyte percentage, %  Eosinophils, ×109/L  Eosinophil percentage, %  Basophils, 109/L  Basophil percentage, % | 6.5 (5.2, 8.2)  3.8 (2.9, 5.4)  60.1 (52.8, 67.2)  1.8 (1.4, 2.4)  28.8 (23.4, 36.4)  2.1 (1.4, 2.8)  0.5 (0.4, 0.6)  7.4 (6.0, 8.9)  0.1 (0.1, 0.2)  1.5 (0.7, 2.7)  0.0 (0.0, 0.0)  0.3 (0.2, 0.5) | 7.4 (6.1, 8.8)  4.9 (3.6, 6.9)  67.7 (60.0, 80.9)  1.5 (1.0, 2.1)  23.2 (12.8, 30.2)  3.0 (2.0, 6.3)  0.5 (0.4, 0.6)  6.8 (5.1, 8.1)  0.1 (0.0, 0.1)  0.6 (0.1, 1.6)  0.0 (0.0, 0.0)  0.2 (0.1, 0.4) | **0.002**  **< 0.001**  **< 0.001**  **< 0.001**  **< 0.001**  **< 0.001**  0.659  **0.005**  **< 0.001**  **< 0.001**  **0.002**  **< 0.001** |
| **Infection-related biomarkers** |  |  |  |
| hs-CRP, mg/L (n=132/63)#  PCT, ng/mL (n=73/38) #  ESR, mm/h (n=99/53) #  Globulin, g/L (n=219/84) #  LDH, g/L (n=216/89) # | 0.8 (0.4, 2.3)  0.05 (0.02, 0.08)  6.0 (3.0, 13.0)  27.0 (24.5, 30.3)  177.0 (154.3, 207.8) | 3.0 (0.6, 24.3)  0.1 (0.1, 0.5)  11.0 (5.0, 28.5)  28.2 (24.6, 33.6)  187.0 (154.0, 245.5) | **< 0.001**  **0.004**  **0.006**  0.083  0.103 |
| **Inflammatory cytokines (n)** | 81 | 45 |  |
| Interleukin-1β, pg/ml  Interleukin-2β, U/mL  Interleukin-6, pg/ml  Interleukin-8, pg/ml  Interleukin-10, pg/ml  Tumor necrosis factor-α, pg/ml | 5.0 (5.0, 5.0)  343.0 (229.5, 451.5)  2.0 (1.5, 3.7)  14.2 (9.4, 42.4)  5.0 (5.0, 5.0)  8.0 (6.2, 18.0) | 5.0 (5.0, 7.4)  434.0 (312.0, 698.5)  3.6 (1.7, 8.5)  25.3 (10.2, 69.8)  5.0 (5.0, 5.0)  11.8 (7.0, 21.7) | 0.082  **0.004**  **0.003**  0.128  0.251  0.132 |
| **Immune-related factors (n)** | 119 | 39 |  |
| Immunoglobulin A, g/L  Immunoglobulin G, g/L  Immunoglobulin M, g/L  Complement C3, g/L  Complement C4, g/L | 1.7 (1.4, 2.6)  10.9 (9.5, 13.3)  1.1 (0.8, 1.5)  0.8 (0.8, 0.9)  0.2 (0.2, 0.2) | 1.7 (1.2, 2.5)  10.5 (9.5, 13.3)  0.9 (0.6, 1.3)  0.8 (0.7, 0.9)  0.2 (0.2, 0.2) | 0.789  0.585  **0.042**  0.249  0.740 |
| **Lymphocyte subsets (n)** | 69 | 36 |  |
| T cells+B cells+NK cells %  T cells+B cells+NK cells /ul  T cells (CD3+CD19-) %  T cells (CD3+CD19-) /ul  B cells (CD3-CD19+) %  B cells (CD3-CD19+) /ul  NK cells (CD3-CD16+ CD56+) %  NK cells (CD3-CD16+ CD56+) /ul  Th cells (CD3+CD4+) %  Th cells (CD3+CD4+) /ul  Ts cells (CD3+CD8+) %  Ts cells (CD3+CD8+) /ul  Th/Ts ratio  Naïve Th cells (CD45RA+Th)/Th %  Memory Th cells (CD45RO+Th)/Th %  CD28+Th cells/Th %  CD28+Ts cells/Th %  Activated T cells (HLA-DR+T) %  Activated Ts cells (HLA-DR+Ts)/Ts %  Treg cells (CD4+CD25+CD127low-) %  Naïve Treg cells (CD45RA+Treg) %  Induced Treg cells (CD45RO+Treg) % | 99.5 (99.3, 99.7)  1790.0 (1416.5, 2502.5)  75.6 (69.8, 80.1)  1390.0 (1054.5, 1910.0)  12.9 (9.4, 17.6)  234.0 (147.5, 402.5)  9.9 (6.4, 13.7)  181.0 (120.5, 293.5)  46.6 (39.4, 52.7)  907.0 (632.5, 1211.0)  23.7 (18.7, 30.4)  427.0 (343.0, 621.5)  1.9 (1.3, 2.7)  32.4 (18.1, 43.0)  67.6 (57.0, 81.9)  96.8 (93.0, 98.7)  67.6 (56.8, 79.5)  13.7 (10.3, 19.7)  32.8 (21.7, 44.8)  3.5 (3.0, 4.1)  0.7 (0.4, 1.2)  2.8 (2.3, 3.1) | 99.3 (98.9, 99.5)  1668.5 (1245.0, 2147.3)  74.2 (64.1, 81.1)  1140.0 (901.0, 1660.8)  11.3 (6.8, 17.2)  208.5 (98.0, 375.5)  11.0 (7.9, 20.7)  188.0 (135.3, 268.3)  45.9 (37.1, 53.7)  700.5 (517.5, 1079.3)  23.0 (19.3, 28.6)  381.0 (261.3, 541.3)  2.0 (1.3, 2.8)  26.1 (18.7, 38.7)  73.9 (61.3, 81.3)  95.9 (92.0, 97.8)  70.2 (57.0, 78.1)  18.0 (12.1, 21.1)  40.7 (29.4, 50.0)  3.0 (2.4, 4.0)  0.6 (0.3, 0.9)  2.3 (2.0, 2.9) | **0.030**  0.154  0.726  0.076  0.262  0.097  0.203  0.790  0.671  0.129  0.821  0.175  0.885  0.627  0.627  0.125  0.992  0.193  0.141  **0.045**  **0.049**  **0.036** |

**Notes:** *Comparison for two groups was assessed by Mann-Whitney *U* or unpaired t-test.

A *p*-value below 0.05 was considered statistically significant. Statistically significant results are bold.

#Data are given as n/N, where n and N are the total number of patients with available data in the uninfected group and infected group, respectively.

**Abbreviations:** anti-AChR-ab, anti-acetylcholine-receptor antibody; anti-MuSK-ab, anti-muscle-specific tyrosine kinase antibody; CI, confidence interval; ESR, Erythrocyte sedimentation rate; hs-CRP, hypersensitive C-reactive protein; LDH, lactate dehydrogenase; MG, myasthenia gravis; MGFA, myasthenia gravis foundation of America classification; NK, natural killer; OR, odds ratio; PCT, procalcitonin; Th cells, helper T cells; Treg cells, regulatory T cells; Ts cells, suppressor T cells.
